# Supplementary material for: Feature selection with the Fisher score followed by the Maximal Clique Centrality algorithm can accurately identify the hub genes of hepatocellular carcinoma
Source: PubMed Central journal article supplement (PMC6872594; doi:10.1038/s41598-019-53471-0), 2019-11-21
Supplement: 41598_2019_53471_MOESM1_ESM.pdf [file 41598_2019_53471_MOESM1_ESM.pdf]

Title: Feature selection with the Fisher score followed by the Maximal Clique Centrality algorithm can accurately identify the hub genes of hepatocellular carcinoma  
Authors : Li Chengzhang, Xu Jiucheng

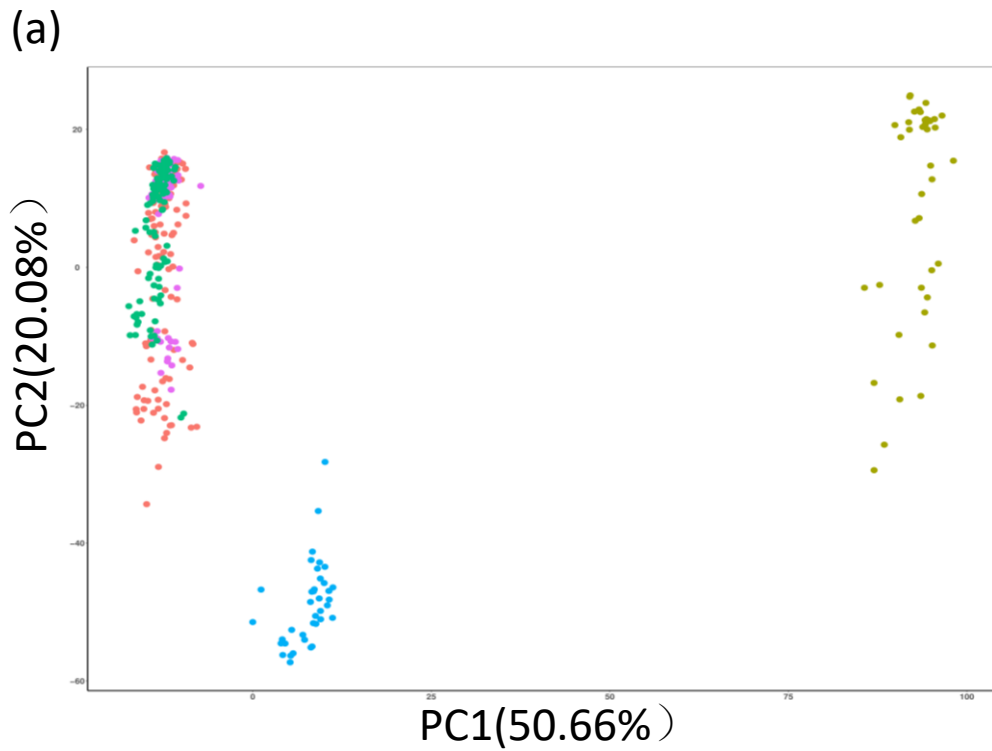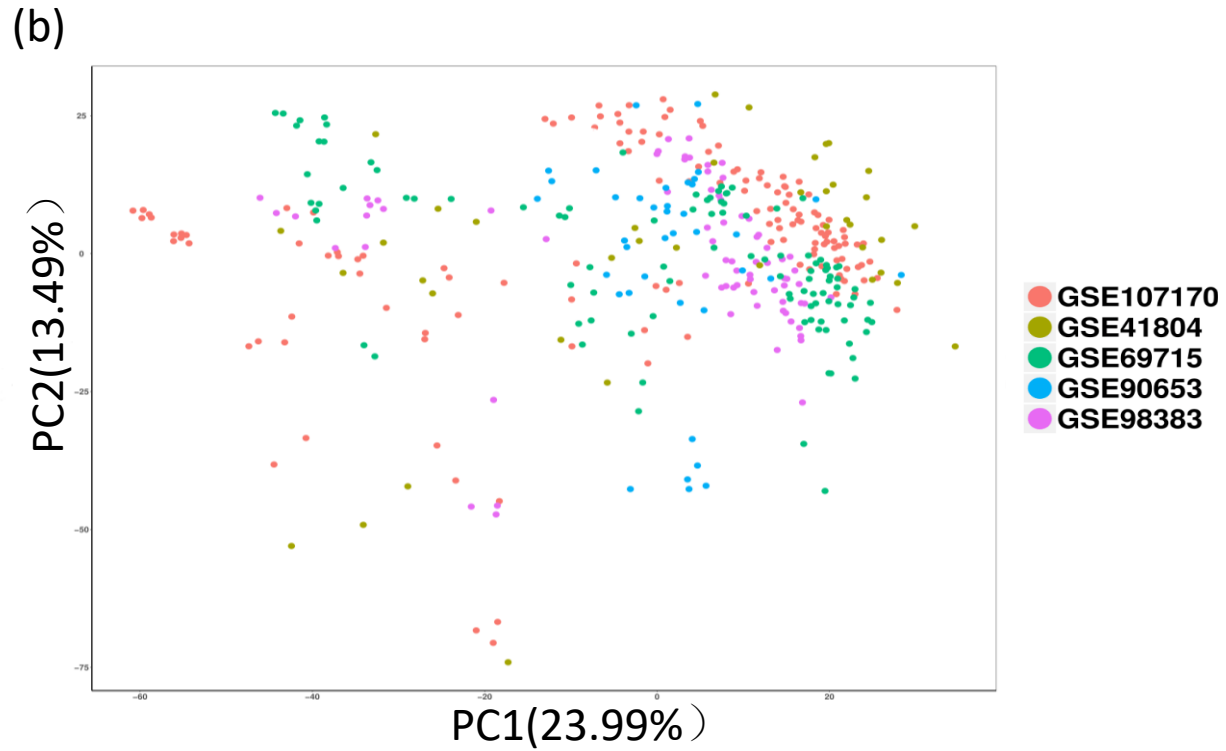

Supplementary Figure 1. Principal component analysis (PCA) of the integrated gene expression profiles. (a) PC1 and PC2 were the top 1 and 2 components, respectively, before the removal of the batch effect. A clear batch effect was identified prior to the batch effect correction. (b) PC1 and PC2 were the top 1 and 2 components, respectively, after the removal of the batch effect. The batch effect was eliminated after the batch effect correction.

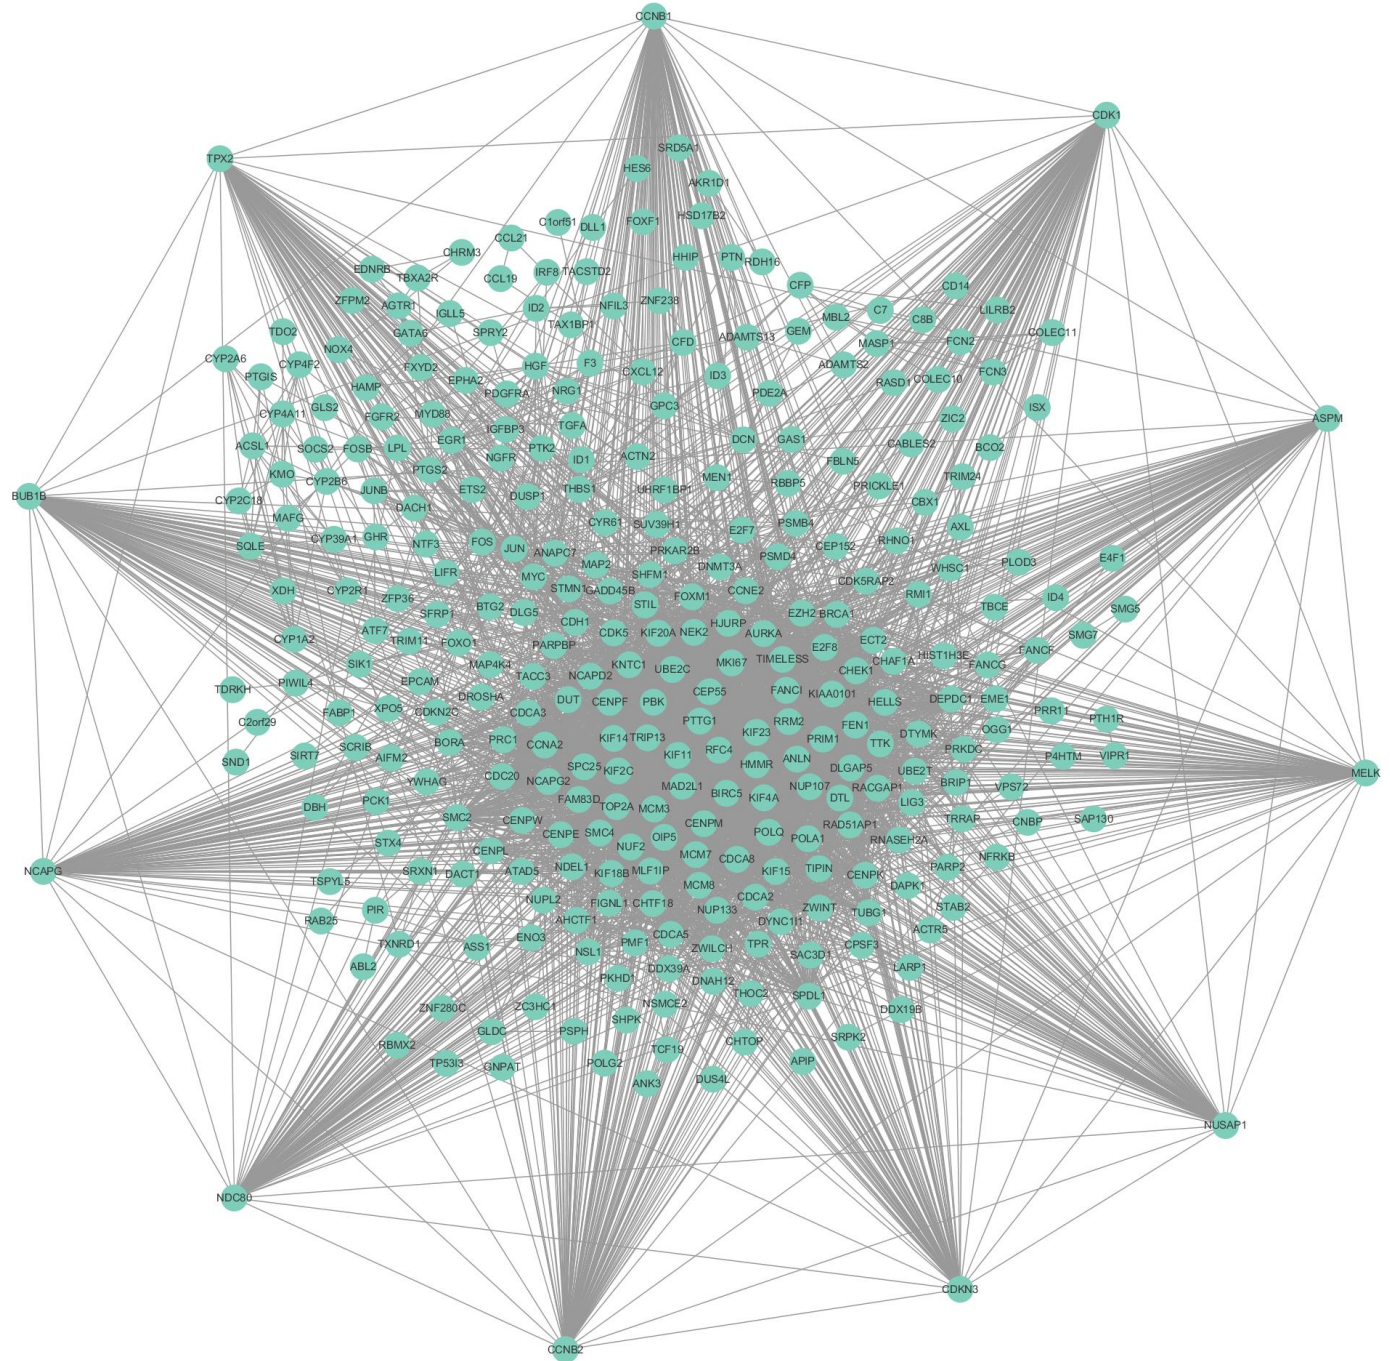

Supplementary Figure 2. Protein-protein interaction network of the feature genes. The network has 374 nodes and 4478 edges. The nodes represent the selected feature genes, and the edges represent the interactions between two genes.
